# Supplementary material for: Synthesis and characterization of a novel antibacterial material containing poly(sulfobetaine) using reverse atom transfer radical polymerization
Source: Royal Society of Chemistry journal article supplement (doi:10.1039/c8ra05793a), 2018-01-01
Supplement: c8ra05793a1.pdf [file c8ra05793a1.pdf]

## Synthesis and characterization of a novel antibacterial material containing poly (sulfobetaine) using reverse atom transfer radical polymerization

Xiaohong Chu<sup>+,a,b</sup>, Ming Zhang<sup>+,a,b</sup>, Ninglin Zhou<sup>a,b,c\*</sup>, Fan Wu<sup>a,b</sup>, Baohong Sun<sup>a,b</sup>, Jian Shen<sup>a,b\*</sup>

<sup>a</sup> Jiangsu Collaborative Innovation Center for biological functional materials, College of Chemistry and Materials Science, Nanjing Normal University, Nanjing 210023, China;

<sup>b</sup> Jiangsu Key Laboratory of Biofunctional Materials, Jiangsu Engineering Research Center for Biomedical Function Materials, Nanjing 210023, China;

<sup>c</sup> Nanjing Zhou Ninglin Advanced Materials Technology Company Limited, Nanjing 211505, China

\*Correspondence to: Tel.: +86 25 85891536 Fax: +86 25 83599188.

<sup>+</sup>These authors contribute equality to this work.

E-mail addresses: zhouninglin@njnu.edu.cn.

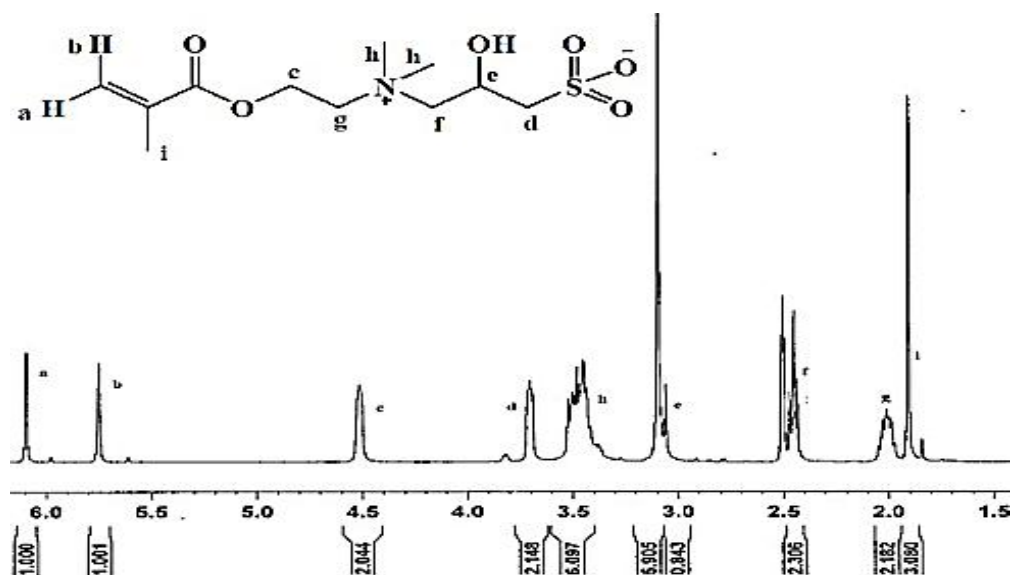

Fig. S1. <sup>1</sup>H NMR spectra of DMCHPS in DMSO.

**Table S1.** Elemental surface composition of PU-Si substrates determined from XPS.

| Sample                | Element (atom %) |       |      |      |       |      | Atomic ratio |
|-----------------------|------------------|-------|------|------|-------|------|--------------|
|                       | C                | O     | N    | Si   | Cl    | S    | O/C          |
| DMCHPS                | 49.87            | 31.66 | 3.96 | -    | 10.02 | 9.06 | 0.63         |
| PU-Si                 | 79.88            | 12.87 | 1.03 | 4.55 | 1.68  | <0.1 | 0.16         |
| PU-Si-g-P(DMCHPS)-12h | 70.43            | 23.97 | 2.80 | 1.95 | 0.86  | <0.1 | 0.34         |
| PU-Si-g-P(DMCHPS)-24h | 69.66            | 24.98 | 2.71 | 2.20 | 0.29  | 0.16 | 0.36         |
| PU-Si-g-P(DMCHPS)-36h | 68.15            | 25.99 | 3.11 | 1.98 | 0.78  | <0.1 | 0.38         |
| PU-Si-g-P(DMCHPS)-48h | 68.36            | 25.91 | 3.29 | 1.81 | 0.63  | <0.1 | 0.38         |

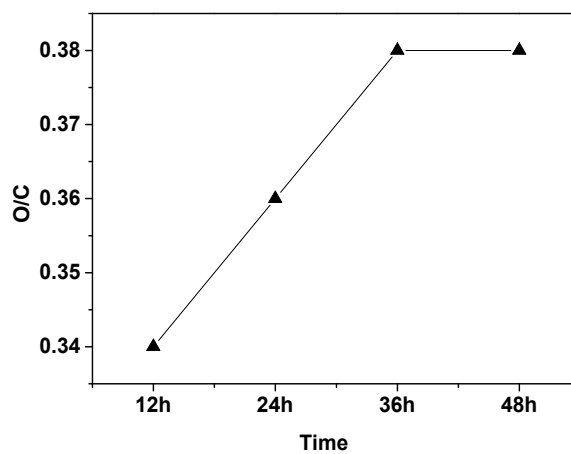

**Fig. S2.** Total atomic ratio of O/C of PU-Si-g-P(DMSCH)-12h, PU-Si-g-P(DMSCH)-24h, PU-Si-g-P(DMSCH)-36h, PU-Si-g-P(DMSCH)-48h.

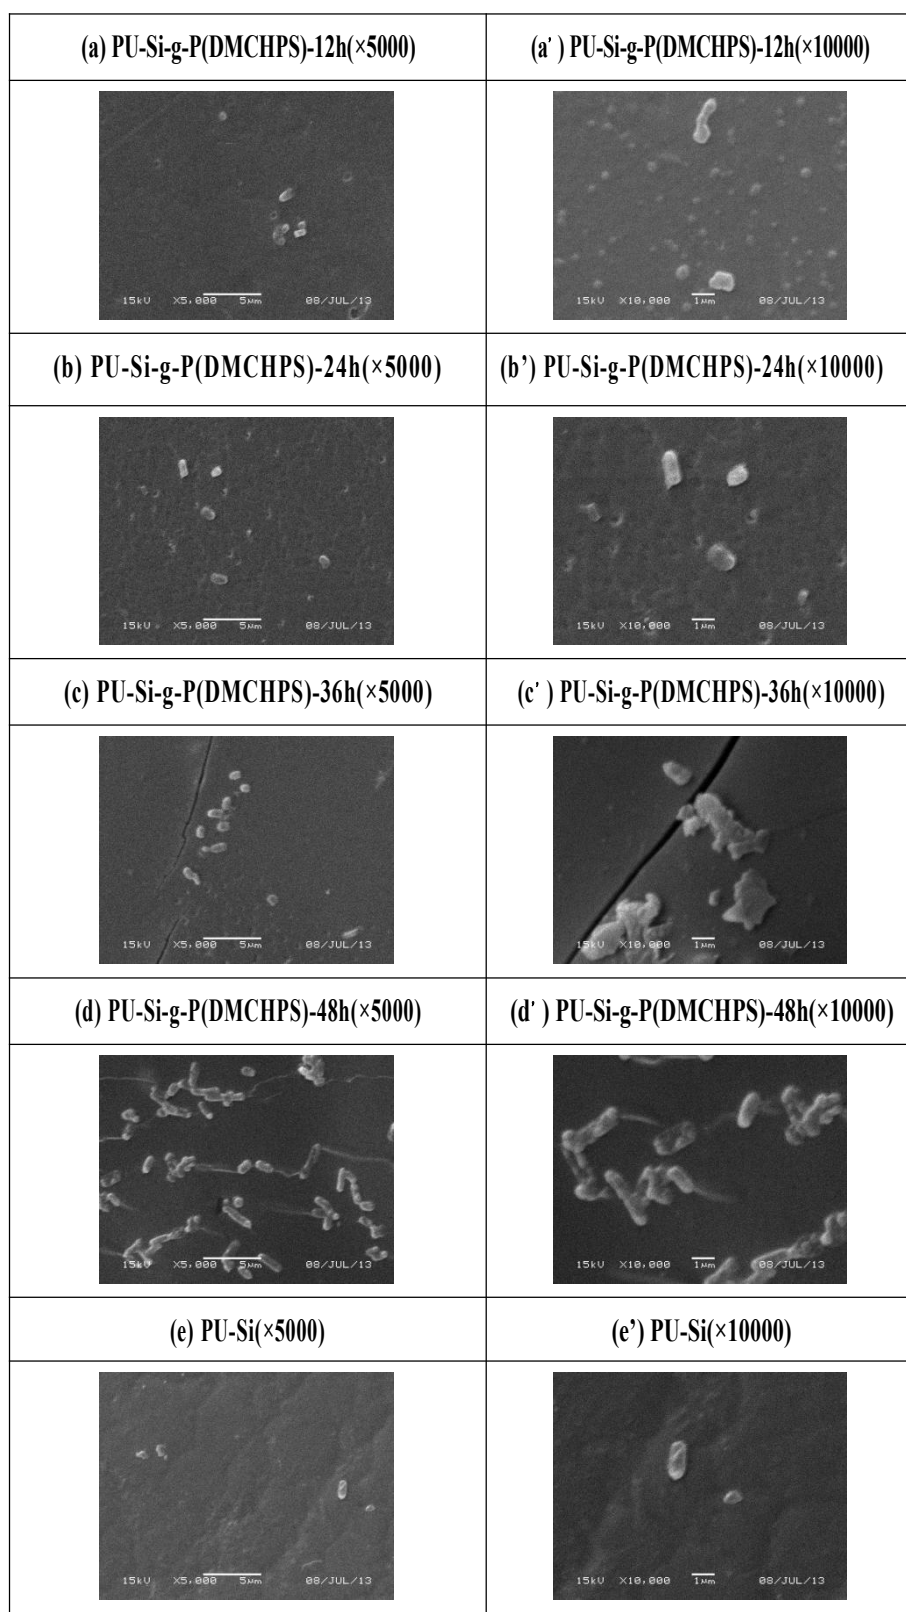

**Fig. S3.** SEM pictures of bacterial adhesion for (a, a') PU-Si-g-P(DMSCH)-12h, (b, b') PU-Si-g-P(DMSCH)-24h, (c, c') PU-Si-g-P(DMSCH)-36h, (d, d') PU-Si-g-P(DMSCH)-48h, (e, e') PU-Si against *E. coli*.

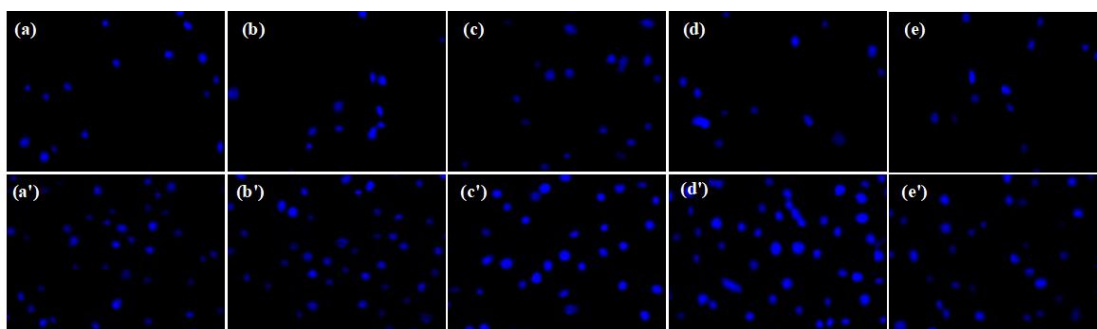

**Fig. S4.** Fluorescent images of HEK293 cells for (a, a') PU, (b, b') PU-Si-g-P(DMCHPS)-12 h, (c, c') PU-Si-g-P(DMCHPS)-24 h, (d, d') PU-Si-g-P(DMCHPS)-36 h, (e, e') PU-Si-g-P(DMCHPS)-48 h, which a-e) and a'-e') are HEK293 cells culture on modified PU films for 24 h and 48 h.
